# Supplementary material
Source: PubMed Central journal article supplement (PMC4497366)
Supplement: NIHMS702710-supplement-supplement_1.pdf [file NIHMS702710-supplement-supplement_1.pdf]

## Supplementary Material

### Supplementary Methods

#### GeLC-MS/MS

Plasma samples from the 10 COPD and 10 control subjects in the discovery group were pooled for further analysis by mixing 50  $\mu$ L of each individual's sample. The

final volume of the pooled sample was 500  $\mu$ L for each group. Each of the pooled COPD and control samples was diluted at a 1:2 ratio with Laemmli sample buffer (BioRad, Hercules, CA) containing 5%  $\beta$ -mercaptoethanol, heated for 10 minutes at 90°C and loaded onto a 10–14% polyacrylamide gel. Electrophoresis was performed using a mini Protean II system (BioRad) at 200 V for 45 minutes. Separation was confirmed by staining with SimplyBlue

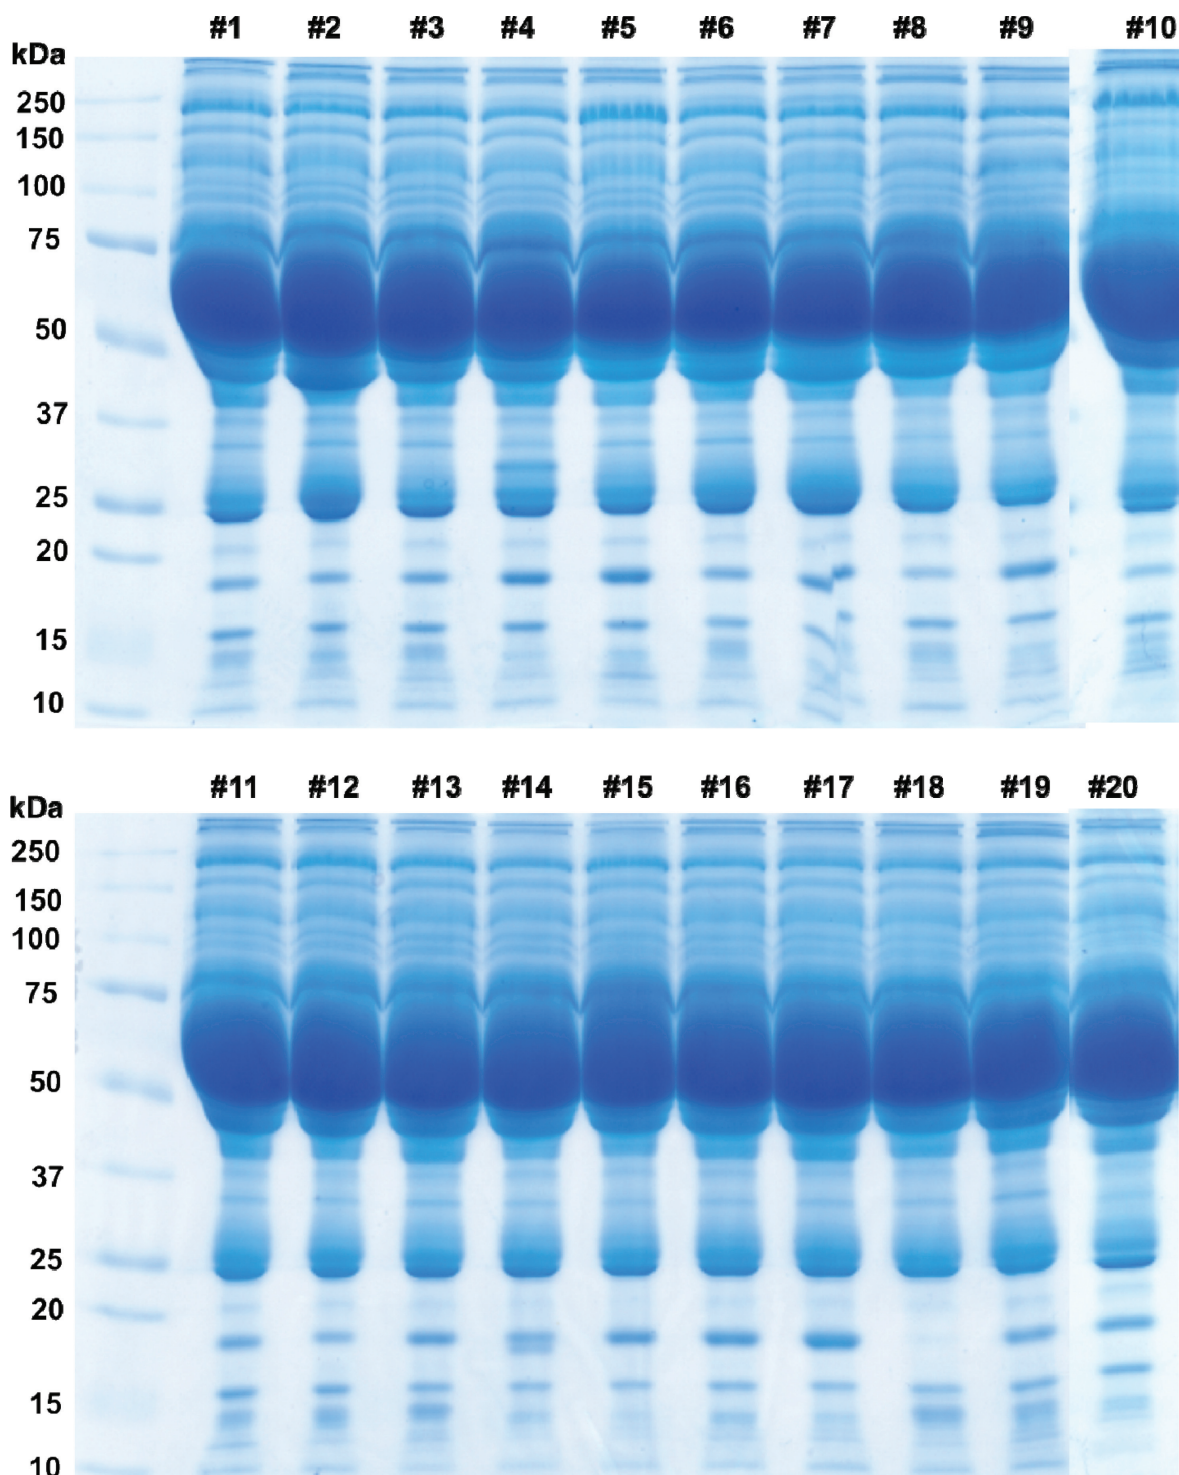

**Figure S1.** Individual 1D SDS PAGE gel of 10 COPD (rows #1 to #10) and 10 control subjects (rows #11 to #20) who comprise the discovery group. Gels show plasma samples in each subject prior to pooling.

Supplementary Table S1.

|                            | Control<br>(n = 10) | COPD<br>(n = 10) | p-value |
|----------------------------|---------------------|------------------|---------|
| Age (yrs)                  | 64 ± 2              | 63 ± 4           | 0.42    |
| Smoking History (pack-yrs) | 61 ± 11             | 57 ± 19          | 0.61    |
| Smoking Cessation (yrs)    | 13 ± 4              | 7 ± 4            | <0.01   |
| FEV <sub>1</sub> (% pred)  | 94 ± 10             | 23 ± 9           | <0.01   |
| FVC (% pred)               | 95 ± 10             | 57 ± 13          | <0.01   |
| FEV <sub>1</sub> /FVC (%)  | 75 ± 3              | 30 ± 8           | <0.01   |
| Emphysema (%)              | 3 ± 1               | 31 ± 4           | <0.01   |
| Height (cm)                | 173 ± 12            | 170 ± 10         | 0.55    |
| Weight (kg)                | 101 ± 32            | 93 ± 30          | 0.56    |
| BMI (kg/m <sup>2</sup> )   | 34 ± 10             | 31 ± 7           | 0.53    |

SafeStain (Invitrogen). Each sample lane was sliced into 20 sections, and each section further cut into ~1 mm<sup>3</sup> slices in preparation for tryptic digestion.

The desalted tryptic peptides were dried in a vacuum centrifuge and resolubilized in 30 µL of 0.1% (vol/vol) trifluoroacetic acid. The tryptic peptide sample was loaded onto a 2 µg capacity peptide trap (CapTrap™; Michrom Bioresources, Auburn, CA), separated by a C18 capillary column (15 cm 75 µm, Agilent) at 300 nL/min (delivered by an Agilent 1100 LC pump). A mobile-phase gradient

was run using mobile phase A (1% acetonitrile/0.1% formic acid) and B (80% acetonitrile/0.1% formic acid) from 0 to 10 minutes with 0–15% B followed by 10–60 minutes with 15–60 % B and 60–65 minutes with 60–100% B.

Nanoelectrospray ionization (ESI) tandem MS was performed using a Brukers HCT Ultra ion trap mass spectrometer. ESI was delivered using a distal-coating spray Silica tip (ID 20 µM, tip inner ID 10 µM, New Objective) at a spray voltage of -1300 V. Using automatic switching between MS and MS/MS modes, MS/MS fragmentation was performed on the two most abundant ions on each spectrum using collision-induced dissociation with active exclusion (excluded after two spectra, and released after 2 min). The complete system was fully controlled by HyStar 3.1 software.

Mass spectra (MS) processing was performed using Brukers Biotoools (Version 2.3.0.0) with search and quantitation toolbox options. The generated de-isotoped peak list was submitted to an in-house Mascot server 2.2 and searched against the Swiss-Prot database (version 56.6 of 16-Dec-2008, 405506 sequences). Mascot search parameters were set as follows: Homo sapiens (20413 sequences); enzyme, trypsin with maximum 1 missed cleavage; fixed modification, cysteine carbamidomethylation; variable modification, methionine oxidation; 0.50 Da mass tolerance for precursor peptide ions; and 0.6 Da for MS/MS fragment ions. All peptide matches were filtered using an ion score cutoff of 10.

Supplementary Table S2. Proteins differentially expressed in COPD

| Protein AC | Gene Name | Protein ID | Protein Name                                         | Molecular Weight | MOWSE Score Ratio | Peptides Ratio COPD/CON | Sequence Coverage Ratio | emPAI Ratio |
|------------|-----------|------------|------------------------------------------------------|------------------|-------------------|-------------------------|-------------------------|-------------|
| P26927     | MST1      | HGFL       | Hepatocyte growth factor-like                        | 80268            | 1.81              | 1.90                    | 1.93                    | 2.16        |
| P43121     | MCAM      | MUC18      | Cell surface glycoprotein                            | 71563            | 2.7               | 3                       | 2.4                     | 3.5         |
| P11021     | HSPA5     | GRP78      | 78 kDa glucose-regulated protein                     | 72288            | 2.76              | 2                       | 2.3                     | 2.25        |
| P12259     | F5        | FA5        | Coagulation factor V                                 | 251514           | 3.6               | 4                       | 5                       | 4           |
| Q86VB7     | CD163     | C163A      | Scavenger receptor cysteine-rich type 1 protein M130 | 125355           | 0.37              | 0.25                    | 0.25                    | 0.25        |
| P13591     | NCAM1     | NCAM1      | Neural cell adhesion molecule                        | 94515            | 0.45              | 0.67                    | 0.56                    | 0.429       |
| Q92954     | PRG4      | PRG4       | Proteoglycan 4                                       | 150984           | 0.50              | 0.50                    | 0.51                    | 0.53        |
| Q15113     | PCLCE     | PCOC1      | Procollagen C-endopeptidase enhancer 1               | 47942            | 0.56              | 0.5                     | 0.59                    | 0.583       |
| P13796     | LCP1      | PLSL       | Plastin-2 OS=Homo sapiens                            | 70245            | 0.57              | 0.57                    | 0.89                    | 0.74        |
| P00488     | F13A1     | F13A       | Coagulation factor XIII A chain                      | 83215            | 0.60              | 0.33                    | 0.36                    | 0.429       |
| Q9UGM5     | FETUB     | FETUB      | Fetuin-B                                             | 42028            | 0.65              | 0.31                    | 0.54                    | 0.589       |
| Protein AC | Gene Name | Protein ID | Protein Name                                         | Molecular Weight | MOWSE Score       | Peptides                | Sequence Coverage       | emPAI       |
| Q96JM7     | LMBL3     | LMBL3      | Lethal(3)malignant brain tumor-like 3 protein        | 88280            | 82                | 2                       | 3                       | 0.04        |
| P49913     | CAMP      | CAMP       | Cathelicidin antimicrobial peptide                   | 19289            | 112               | 2                       | 10                      | 0.36        |
| Q12860     | CNTN1     | CNTN1      | Contactin-1                                          | 113249           | 112               | 3                       | 4.3                     | 0.03        |
| P19320     | VCAM1     | VCAM1      | Vascular cell adhesion protein 1                     | 81224            | 120               | 3                       | 4.5                     | 0.08        |
| Q9NPH3     | IL1RAP    | IL1AP      | Interleukin-1 receptor accessory protein             | 65377            | 145               | 5                       | 7                       | 0.10        |
| AF144011   | DCD       | DCD        | Dermcidin                                            | 11277            | 70                | 1                       | 10                      | 0.08        |
| P22891     | PROZ      | PROZ       | Vitamin K-dependent protein Z                        | 44715            | 197               | 6                       | 16.5                    | 0.46        |

The following two criteria were used to evaluate protein identification: one peptide with ion score  $\geq 35$ , two or more peptides with at least one ion score  $\geq 20$  ( $p < 0.05$  threshold) and the cumulative Mascot scores  $\geq 35$ . For all proteins with cumulative MOWSE scores  $\geq 20$  and  $\leq 35$ , the theoretical and experimental gel molecular weights had to be consistent. When these criteria were used to search against a reversed decoy Swiss-Prot database, no false positive match was obtained (false discovery  $< 0.5\%$ ). For added stringency, proteins with scores above 40 were used for comparisons between samples. Protein quantitation using label-free methods was performed by averaging the results of: 1) the relative intensities of extracted ion chromatograms determined by Mascot Distiller; 2) the number of peptide fragments of a given protein isolated; 3) sequence coverage; and 4) the exponentially modified Protein Abundance Index (emPAI).

### Western Blotting/ELISA of Individual Samples

Western blotting was used to assess expression of 3 proteins increased in the COPD pooled sample i.e., glucose regulated protein 78 (GRP 78), interleukin 1 receptor accessory protein (IL1AP), and macrophage stimulating protein 9 (MSTP9). Proteins (30  $\mu\text{g}$ ) were separated by 10–14% gradient SDS-PAGE and transferred to a

nitrocellulose membrane in a semi-dry blotting chamber (Biorad, Hercules, CA). Blots were blocked with 5% milk in Tris-buffer saline solution (pH 7.6) containing 0.05% Tween-20 (TBS/T), and probed with the following rabbit anti-human antibodies (Santa Cruz Biotechnology, Santa Cruz, CA): GRP78, IL1AP and MSTP9. Primary antibodies were used at a concentration of 0.4  $\mu\text{g}/\text{mL}$ . Goat anti-human IgG HRP (Santa Cruz Biotechnology) was used as a loading control. Blots were incubated with primary antibody overnight at 4°C with gentle shaking and then incubated with a mouse, anti-rabbit HRP-conjugated secondary Ab (1:10000) (Biomedica Corp, Foster City, CA) for 1 hr at room temperature. Blots were exposed by a chemiluminescent method (Enhanced ECL Detection System, Amersham Biosciences) and scanned by FLA 5100 (FujiFilm, Edison, NJ). The density of protein bands was determined using NIH free-ware (ImageJ) software).

Soluble CD163 (sCD163) was measured by ELISA using a commercially available 96-well plate immunoassay kit according to the manufacturers' directions (Macro163, Trillium Diagnostics, Groningen, Netherlands). A 1:500 dilution of plasma was assayed in each well in a final volume of 100  $\mu\text{L}$  in each well. Assays were run in duplicate. Optical density changes were read in a microtiter plate reader (BioRad, model 550).
